# Supplementary material for: Chemical Composition and Potential Environmental Impacts of Water-Soluble Polar Crude Oil Components Inferred from ESI FT-ICR MS
Source: PLOS journal article supplement (doi:10.1371/journal.pone.0136376), 2015-09-01
Supplement: S5 (10.1371/journal.pone.0136376.s005) [file journal.pone.0136376.s005]

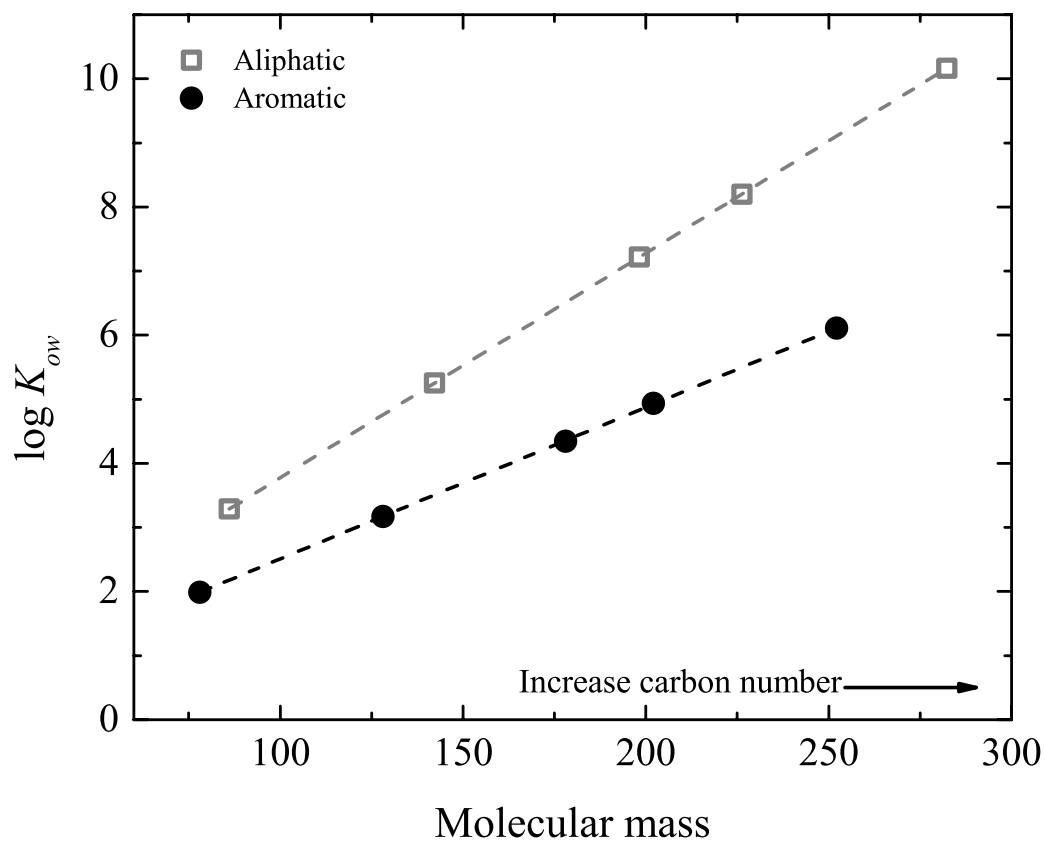

**S5 Fig.** Molecular mass vs. octanol-water partition coefficient ( $\log K_{ow}$ ) for C<sub>6</sub> to C<sub>20</sub> n-alkanes (grey: hexane, decane, tetradecane, hexadecane, and eicosane) and aromatic hydrocarbons (black: benzene, naphthalene, phenanthrene, pyrene, and benzo[a]pyrene).
